# Supplementary figures and images for: Distinct combinations of variant ionotropic glutamate receptors mediate thermosensation and hygrosensation in Drosophila
Source: eLife journal article supplement (doi:10.7554/elife.17879), 2016-09-22

**Figure 4 - supplement 1**

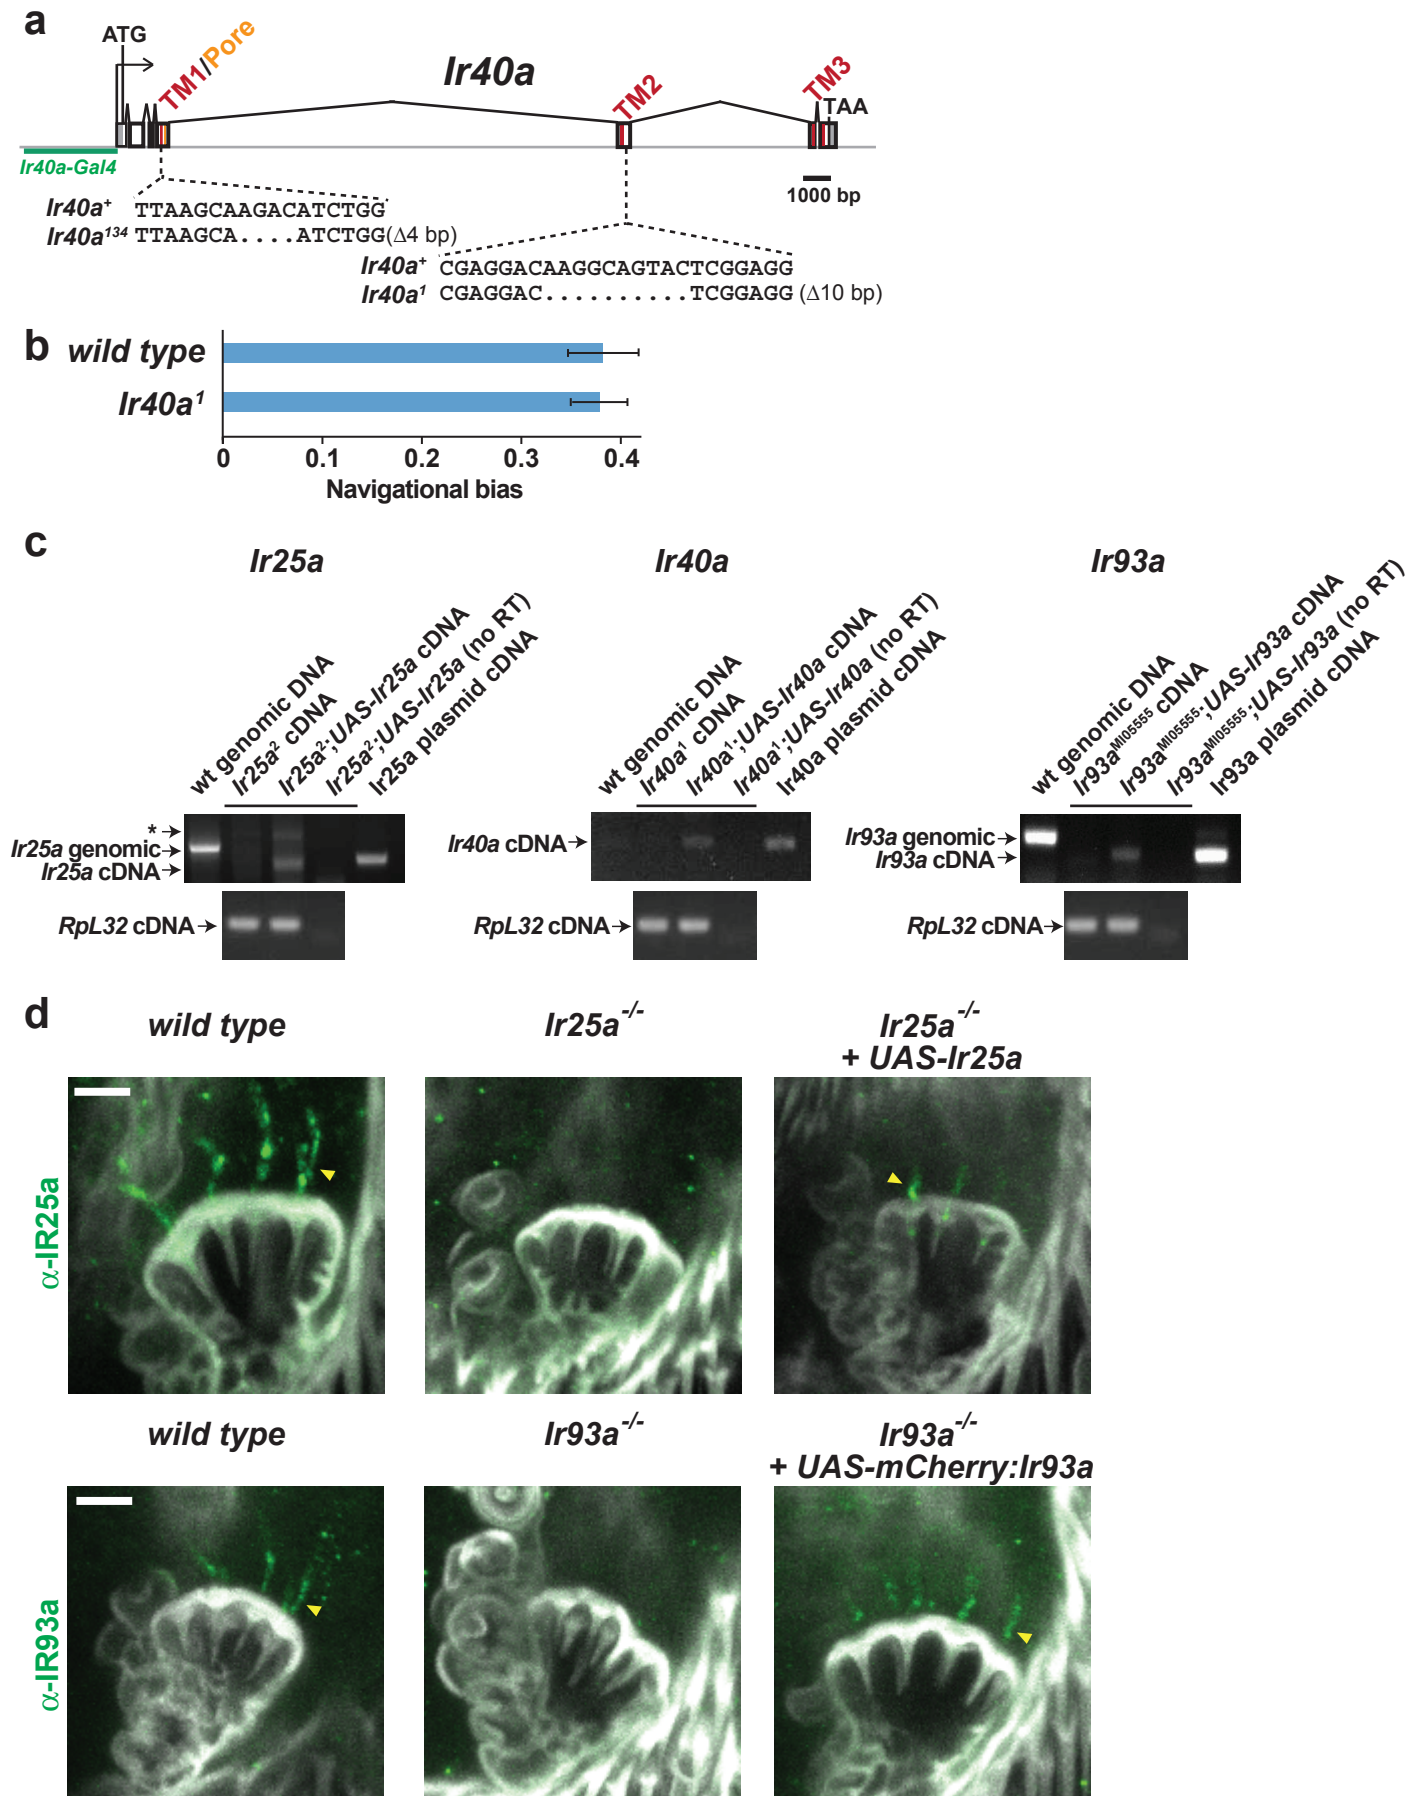

Supplement: supp [file elife-17879-supp-v1.zip]
